# Supplementary material
Source: MDPI journal article supplement (https://www.mdpi.com/2072-4292/13/12/2256)
Supplement: s1 [file s1]

## BOD

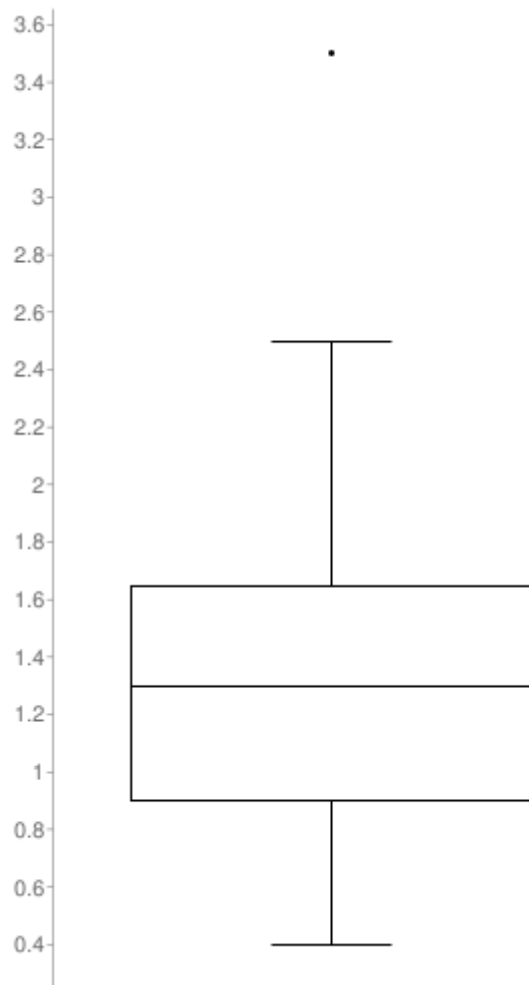

Median: 1.3, Minimum: 0.4, Maximum: 3.5, First quartile: 0.9, Third quartile: 1.65, Interquartile Range: 0.75, Outlier: 3.5

Figure S1. Outlier detection for BOD.

## TP

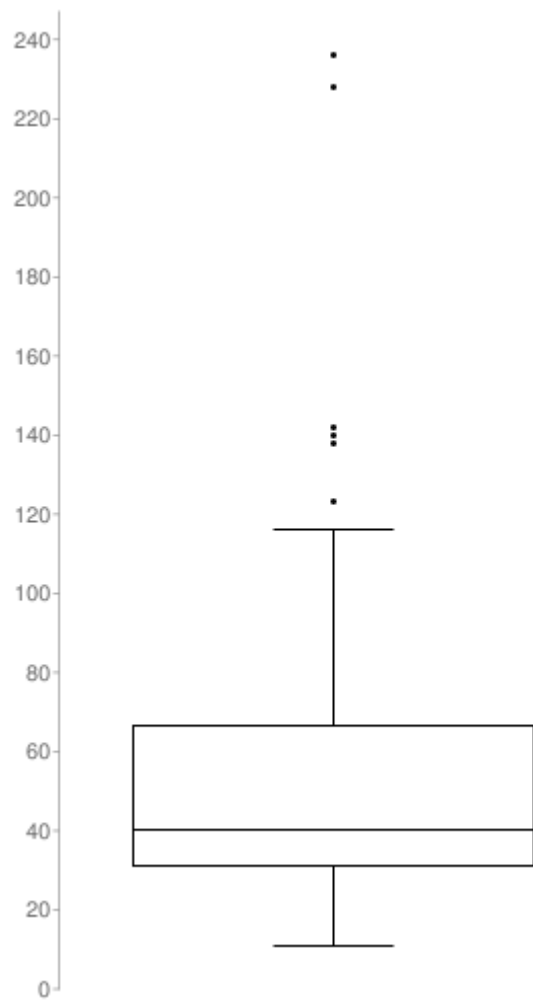

Median: 40, Minimum: 11, Maximum: 236, First quartile: 31, Third quartile: 66.75, Interquartile Range: 35.75, Outlier: 123, 138, 140, 142, 228, 236

Figure S2. Outlier detection for TP

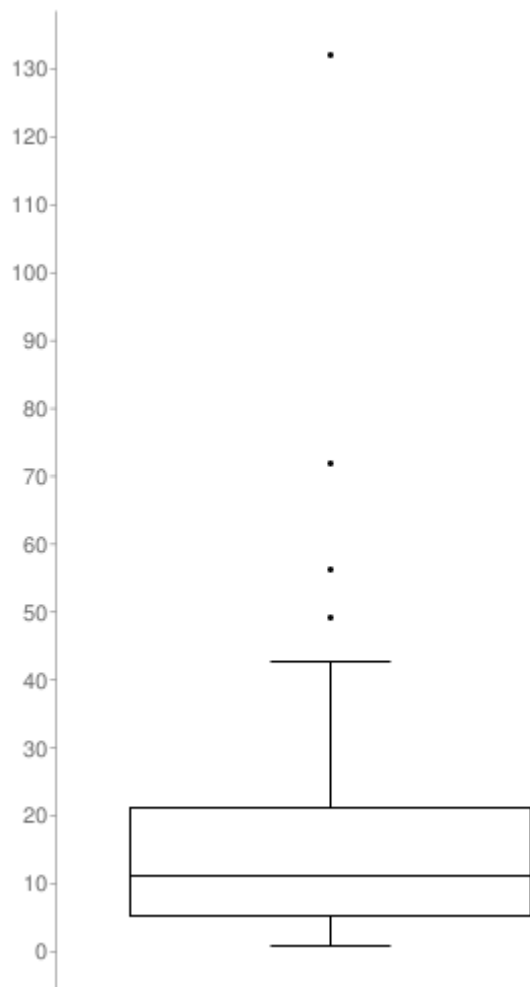

Median: 11.2, Minimum: 0.9, Maximum: 132, First quartile: 5.3, Third quartile: 21.05, Interquartile Range: 15.75, Outlier: 49.1, 56.3, 71.9, 132

Figure S3. Outlier detection for CHL-a
